# Supplementary material for: Neutrophil to Lymphocyte Ratio in Maternal Blood: A Clue to Suspect Amnionitis
Source: MDPI journal article supplement (doi:10.3390/jcm10122673), 2021-06-17
Supplement: s1 [file s1]

**Supplementary Table S1.** Previous studies reporting the relationship between maternal inflammatory blood markers and acute histologic chorioamnionitis (acute-HCA) in extra-placental membranes (EPM).

| Primary author (year) | Inclusion Criteria (i.e., GAD)         | Timing of maternal blood tests | Causes of PTB (N) | N (HCA [-] vs. HCA [+]) | Diagnostic criteria for acute-HCA in EPM       | Inflammation in the subdivisions of EPM | Inclusion of whole subdivision of EPM | Frequency of inflammation in subdivisions of EPM [%] | Maternal inflammatory blood marker | Correlation between each marker and acute-HCA in EPM |                    | Correlation between each marker and the progression of acute-HCA in EPM |                    |
|-----------------------|----------------------------------------|--------------------------------|-------------------|-------------------------|------------------------------------------------|-----------------------------------------|---------------------------------------|------------------------------------------------------|------------------------------------|------------------------------------------------------|--------------------|-------------------------------------------------------------------------|--------------------|
|                       |                                        |                                |                   |                         |                                                |                                         |                                       |                                                      |                                    | No adjustment                                        | Adjustment for GAD | No adjustment                                                           | Adjustment for GAD |
|                       |                                        |                                |                   |                         |                                                |                                         |                                       |                                                      |                                    |                                                      |                    |                                                                         |                    |
| Kidokoro (2006) [13]  | 1. Singleton                           | Delivered <48 h                | Threatened        | 60                      | Blanc's criteria                               | Stage I : Intervillositis               | N/A                                   | N/A                                                  | 1. WBC                             | 1. HCA (-) < HCA (+)                                 | N/A                | N/A                                                                     | N/A                |
|                       | 2. GA: 16-35 wks                       | after maternal                 | abortion, PTL,    | (15 vs. 45)             | [43]                                           | Stage II: Chorionitis                   |                                       |                                                      | 2. CRP                             | 2. HCA (-) < HCA (+)                                 |                    |                                                                         |                    |
|                       | 3. PTL, Preterm-PROM                   | blood test                     | preterm-PROM      |                         |                                                | Stage III: CAM                          |                                       |                                                      |                                    |                                                      |                    |                                                                         |                    |
|                       | 4. Delivered <48 h after amniocentesis |                                |                   |                         |                                                |                                         |                                       |                                                      |                                    |                                                      |                    |                                                                         |                    |
| Erdemir (2013) [14]   | GAD < 35 wks                           | During labor                   | N/A               | 43                      | Maternal                                       | N/A                                     | N/A                                   | N/A                                                  | 1. WBC                             | 1. HCA (-) = HCA (+)                                 | N/A                | N/A                                                                     | N/A                |
|                       |                                        |                                |                   | (33 vs. 10)             | neutrophils                                    |                                         |                                       |                                                      | 2. CRP                             | 2. HCA (-) = HCA (+)                                 |                    |                                                                         |                    |
|                       |                                        |                                |                   |                         | infiltration into amnion, chorion, and decidua |                                         |                                       |                                                      |                                    |                                                      |                    |                                                                         |                    |
| Park (2013) [15]      | 1. 20.0 ≤ GAD <34.5 wks                | Delivered <5 d                 | PTL (53)          | 53                      | Modified                                       | Choriodecidualitis                      | N/A                                   | Chorio-                                              | 1. CRP                             | 1. HCA (-) < HCA (+)                                 | N/A                | Amnionitis;                                                             | Anelevated CRP     |
|                       | 2. PTB due to PTL                      | after maternal                 |                   | (7 vs. 42)              | Salafia's criteria                             | Amnionitis                              |                                       | decidualitis:                                        |                                    |                                                      |                    | CRP<0.7 vs.                                                             | was predictor for  |
|                       | 3. IAI                                 | blood test                     |                   |                         | [44]                                           |                                         |                                       | 73.5%,                                               |                                    |                                                      |                    | CRP≥0.7 (mg/dL)                                                         | amnionitis.        |
|                       | 4. Delivered <5 d of amniocentesis     |                                |                   |                         |                                                |                                         |                                       | Amnionitis: 45.3%                                    |                                    |                                                      |                    | ≈7.1% [1/14] ↓ vs. 50.9% [23/39] ↑                                      |                    |
| Kim (2014) [16]       | 1. Singleton                           | On admission.                  | PTB (483):        | 442                     | MIR:                                           | N/A                                     | N/A                                   | N/A                                                  | 1. Neutrophil                      | 1. HCA (-) < HCA (+)                                 | N/A                | N/A                                                                     | N/A                |
|                       | 2. PTB due to                          |                                | PTL (245) vs.     | (196 vs.                | subchorionitis,                                |                                         |                                       |                                                      | 2. Lymphocyte                      | 2. HCA (-) < HCA (+)                                 |                    |                                                                         |                    |
|                       | preterm-PROM or PTL                    |                                | preterm-PROM      | 246)                    | CAM, decidualitis,                             |                                         |                                       |                                                      | 3. Monocyte                        | 3. HCA (-) < HCA (+)                                 |                    |                                                                         |                    |
|                       | 3. GAD: 24-37 wks                      |                                | (238)             |                         | or free                                        |                                         |                                       |                                                      | 4. Eosinophil                      | 4. HCA (-) = HCA (+)                                 |                    |                                                                         |                    |
|                       |                                        |                                |                   |                         | membranitis                                    |                                         |                                       |                                                      | 5. Basophil                        | 5. HCA (-) = HCA (+)                                 |                    |                                                                         |                    |
|                       |                                        |                                |                   |                         |                                                |                                         |                                       |                                                      |                                    | 6. HCA (-) < HCA (+)                                 |                    |                                                                         |                    |
|                       |                                        |                                |                   |                         |                                                |                                         |                                       |                                                      | 6. CRP                             | 7. HCA (-) < HCA (+)                                 |                    |                                                                         |                    |
|                       |                                        |                                |                   |                         |                                                |                                         |                                       |                                                      | 7. NLR                             |                                                      |                    |                                                                         |                    |

|                               |                                                                    |                                         |                                                    |                                           |                                        |                                                                                                 |     |                                                    |                                                                                                                         |                                                                                                                                                                                                                      |                      |     |     |
|-------------------------------|--------------------------------------------------------------------|-----------------------------------------|----------------------------------------------------|-------------------------------------------|----------------------------------------|-------------------------------------------------------------------------------------------------|-----|----------------------------------------------------|-------------------------------------------------------------------------------------------------------------------------|----------------------------------------------------------------------------------------------------------------------------------------------------------------------------------------------------------------------|----------------------|-----|-----|
| Martinez-Portilla (2019) [17] | 1. Singleton<br>2. GAD: 30-35 wks<br>3. Preterm-PROM               | IL-6: at enrollment;<br>WBC: every 72 h | Preterm-PROM (47)                                  | 47<br>(31 vs. 16)                         | Redline's criteria<br>[6]              | Stage 1: Acute<br>subchorionitis or<br>chorionitis<br>Stage 2: ACAM<br>Stage 3: necrotizing CAM | N/A | N/A                                                | 1. WBC<br>2. Leukocytosis<br>3. Segmented cells<br>4. IL-6 (pg/mL)                                                      | 1. HCA (-) = HCA (+)<br>2. HCA (-) = HCA (+)<br>3. HCA (-) = HCA (+)<br>4. HCA (-) < HCA (+)                                                                                                                         | N/A                  | N/A | N/A |
| Howman (2012) [18]            | GAD: 24-42 wks                                                     | Immediately<br>prior to delivery        | N/A<br>* PTB (222)                                 | 325<br>(299 vs. 26)                       | Redline's criteria<br>[6]              | Stage 1: Acute<br>subchorionitis or<br>chorionitis<br>Stage 2: ACAM<br>Stage 3: necrotizing CAM | N/A | Stage 1: 23.1%<br>Stage 2: 34.6%<br>Stage 3: 42.3% | 1. hsCRP (mg/L)<br>2. Procalcitonin                                                                                     | 1. HCA (-) < HCA (+)<br>2. HCA (-) = HCA (+)                                                                                                                                                                         | N/A                  | N/A | N/A |
| Xie (2015) [19]               | 1. preterm-PROM < 34 wks                                           | At admission<br>and before<br>delivery  | Preterm-PROM<br>(371)                              | 371<br>(110 vs. 261)                      | N/A                                    | N/A                                                                                             | N/A | N/A                                                | 1. CRP<br>2. WBC                                                                                                        | Before delivery<br>HCA (-) < HCA (+)<br>Before delivery<br>HCA (-) = HCA (+)                                                                                                                                         | N/A                  | N/A | N/A |
| Kim (2016) [20]               | 1. Singleton<br>2. GA 20-34 wks                                    | At amniocentesis                        | Preterm-PROM<br>(181)                              | 146<br>(72 vs. 74)                        | Modified<br>Salafia's criteria<br>[44] | Choriodecidualitis<br>Amnionitis                                                                | N/A | N/A                                                | 1. WBC<br>2. CRP                                                                                                        | 1. HCA (-) < HCA (+)<br>2. HCA (-) < HCA (+)                                                                                                                                                                         | N/A                  | N/A | N/A |
| Park (2019) [21]              | 1. PTL 23-34 weeks<br>2. Delivered <96 h of<br>maternal blood test | Delivered <96 h<br>of blood test        | PTL (73)                                           | 73<br>(30 vs. 44)                         | Modified<br>Salafia's criteria<br>[44] | Choriodecidualitis<br>Amnionitis                                                                | N/A | N/A                                                | 1. CRP<br>2. MMP-9<br>3. TIMP-1<br>4. IL-6<br>5. Angiopoietin-2<br>6. S100 A8/A9<br>7. CXCL14<br>8. APRIL<br>9. IGFBP-2 | 1. HCA (-) < HCA (+)<br>2. HCA (-) = HCA (+)<br>3. HCA (-) = HCA (+)<br>4. HCA (-) < HCA (+)<br>5. HCA (-) = HCA (+)<br>6. HCA (-) < HCA (+)<br>7. HCA (-) = HCA (+)<br>8. HCA (-) = HCA (+)<br>9. HCA (-) < HCA (+) | N/A                  | N/A | N/A |
| Hackney (2008) [22]           | 1. Singleton<br>2. Before 13 wks of<br>estimated GA                | At enrollment                           | PTB (8)<br>HCA (-) vs. HCA (+)<br>= 8.3% vs. 13.9% | Nested-<br>case<br>control<br>study<br>72 | Redline's criteria<br>[6]              | Stage 1: Acute<br>subchorionitis or<br>chorionitis<br>Stage 2: ACAM<br>Stage 3: necrotizing CAM | N/A | Stage 1: 58%<br>Grade 1: 69%                       | CRP                                                                                                                     | HCA (-) = HCA (+)                                                                                                                                                                                                    | HCA (-) =<br>HCA (+) | N/A | N/A |

|                            |                                                                                                                                         |              |                                          |                         |                                                                                                                        |                                                                                    |     |                                                           |                                                                                                                |                                                                                                                                                                                              |     |     |     |
|----------------------------|-----------------------------------------------------------------------------------------------------------------------------------------|--------------|------------------------------------------|-------------------------|------------------------------------------------------------------------------------------------------------------------|------------------------------------------------------------------------------------|-----|-----------------------------------------------------------|----------------------------------------------------------------------------------------------------------------|----------------------------------------------------------------------------------------------------------------------------------------------------------------------------------------------|-----|-----|-----|
|                            | 3. GAD: HCA (-), 38.3<br><br>[34.2-41.2] wks; HCA (+),<br><br>38.3 [17-41] wks                                                          |              |                                          | (36 vs. 36)             |                                                                                                                        |                                                                                    |     |                                                           |                                                                                                                |                                                                                                                                                                                              |     |     |     |
| Wu<br>(2009)<br>[23]       | 1. Preterm infants:<br><br>NICU admission<br><br>2. GAD: HCA (-), 33.0±2.6<br>wks; HCA (+), 30.8±4.1 wks                                | N/A          | N/A                                      | 77<br><br>(50 vs. 27)   | Diffuse<br><br>infiltration or<br><br>aggregation of<br><br>PMN leukocytes<br><br>in<br><br>chorioamnion<br><br>plate. | N/A                                                                                | N/A | N/A                                                       | 1. WBC<br><br>2. Segments<br><br>3. Lymphocytes<br><br>4. Bands<br><br>5. CRP<br><br>6. Hb<br><br>7. Platelets | 1. HCA (-) < HCA (+)<br><br>2. HCA (-) = HCA (+)<br><br>3. HCA (-) = HCA (+)<br><br>4. HCA (-) = HCA (+)<br><br>5. HCA (-) = HCA (+)<br><br>6. HCA (-) = HCA (+)<br><br>7. HCA (-) = HCA (+) | N/A | N/A | N/A |
| Yamada<br>(2000)<br>[24]   | 1. Singleton<br><br>2. Intact membranes<br>without bleeding<br><br>3. GAD, 27-41 wks                                                    | N/A          | PTL (6)                                  | 39<br><br>(29 vs. 10)   | Blanc's criteria<br><br>[43]                                                                                           | Stage I:<br><br>Intervillositis<br><br>Stage II: Chorionitis<br><br>Stage III: CAM | N/A | N/A                                                       | 1. WBC<br><br>2. CRP                                                                                           | 1. HCA (-) = HCA (+)<br><br>2. HCA (-) = HCA (+)                                                                                                                                             | N/A | N/A | N/A |
| Kurakazu<br>(2019)<br>[25] | 1. Singleton<br><br>2. PTL<br><br>3. suspected intrauterine<br>infection<br><br>4. GAD: HCA (-), 34.3±4.3<br>wks; HCA (+), 29.3±3.7 wks | N/A          | PTL (80)                                 | 80<br><br>(31 vs. 49)   | Blanc's criteria<br><br>[43]                                                                                           | Stage I: Intervillositis<br><br>Stage II: Chorionitis<br><br>Stage III: CAM        | N/A | N/A                                                       | 1. WBC<br><br>2. CRP                                                                                           | 1. HCA (-) < HCA (+)<br><br>2. HCA (-) < HCA (+)                                                                                                                                             | N/A | N/A | N/A |
| Maeda<br>(1997)<br>[26]    | 1. GAD 22-34 wks                                                                                                                        | At delivery  | PTB (29) = PTL vs<br>Preterm-PROM        | 29<br><br>(11 vs. 18)   | Blanc's criteria<br><br>[45]                                                                                           | Stage I: Intervillositis<br><br>Stage II: Chorionitis<br><br>Stage III: CAM        | N/A | Stage 1: 5.6%<br><br>Stage 2: 55.6%<br><br>Stage 3: 38.9% | 1. IL-6<br><br>2. IL-8<br><br>3. MCAF<br><br>4. CRP<br><br>5. WBC<br><br>6. sIL-6R                             | 1. HCA (-) < HCA (+)<br><br>2. HCA (-) = HCA (+)<br><br>3. HCA (-) = HCA (+)<br><br>4. HCA (-) < HCA (+)<br><br>5. HCA (-) = HCA (+)<br><br>6. HCA (-) = HCA (+)                             | N/A | N/A | N/A |
| Kwak<br>(2015)<br>[27]     | 1. PTL<br><br>2. Preterm-PROM<br><br>3. GAD, 34.1±3.7 wks                                                                               | At admission | PTB (165)<br>= PTL (90) vs.<br>PROM (75) | 165<br><br>(121 vs. 45) | N/A                                                                                                                    | N/A                                                                                | N/A | N/A                                                       | 1. CRP                                                                                                         | 1. HCA (-) < HCA (+)                                                                                                                                                                         | N/A | N/A | N/A |

|                             |                                                                                                                |                                  |                                                     |                    |                                                                                  |                                      |     |                                                                                                              |                                                                                                                                                                                                                                            |                                                                                                                                                                                                                                                                                                                                                                                                       |     |     |     |
|-----------------------------|----------------------------------------------------------------------------------------------------------------|----------------------------------|-----------------------------------------------------|--------------------|----------------------------------------------------------------------------------|--------------------------------------|-----|--------------------------------------------------------------------------------------------------------------|--------------------------------------------------------------------------------------------------------------------------------------------------------------------------------------------------------------------------------------------|-------------------------------------------------------------------------------------------------------------------------------------------------------------------------------------------------------------------------------------------------------------------------------------------------------------------------------------------------------------------------------------------------------|-----|-----|-----|
| Steinborn<br>(2000)<br>[28] | 1. Singleton<br><br>2. GAD, 13-36 wks                                                                          | Delivered <72 h<br>of blood test | PTB (PTL<br>vs.preterm- PROM)<br><br>97 (36 vs. 61) | 97<br>(49 vs. 48)  | Modified<br>Salafia's criteria<br><br>[44]                                       | Choriodecidualitis<br><br>Amnionitis | N/A | N/A                                                                                                          | 1. ICAM-1<br><br>2. WBC<br><br>3. CRP                                                                                                                                                                                                      | 1. HCA (-) < HCA (+)<br><br>2. HCA (-) < HCA (+)<br><br>3. HCA (-) < HCA (+)                                                                                                                                                                                                                                                                                                                          | N/A | N/A | N/A |
| Oh<br>(2011)<br>[29]        | 1. Singleton<br><br>2. PTL or preterm-PROM<br><br>2. GA 21-35 wks<br><br>3. Delivery <72 h of<br>amniocentesis | At amniocentesis                 | PTB (99)<br><br>= PTL (38) vs.<br>preterm-PROM (61) | 99<br>(55 vs. 44)  | Modified<br>Salafia's criteria<br><br>[44]                                       | Choriodecidualitis<br><br>Amnionitis | N/A | N/A                                                                                                          | 1. CRP                                                                                                                                                                                                                                     | 1. HCA (-) < HCA (+)                                                                                                                                                                                                                                                                                                                                                                                  | N/A | N/A | N/A |
| Makino<br>(2003)<br>[30]    | 1. Singleton<br><br>2. GAD 24-39 wks                                                                           | Before delivery                  | N/A                                                 | 18<br>(10 vs. 8)   | N/A                                                                              | N/A                                  | N/A | N/A                                                                                                          | 1. Total AM<br><br>2. Mature AM<br><br>3. CRP                                                                                                                                                                                              | 1. HCA (-) < HCA (+)<br><br>2. HCA (-) < HCA (+)<br><br>3. HCA (-) < HCA (+)                                                                                                                                                                                                                                                                                                                          | N/A | N/A | N/A |
| Cho<br>(2017)<br>[31]       | 1. Singleton<br><br>2. GA 20-37 wks<br><br>3. Preterm-PROM                                                     | N/A                              | Preterm-PROM<br><br>(149)                           | 149<br>(87 vs. 62) | N/A                                                                              | N/A                                  | N/A | Chorionitis:<br><br>11.3%<br><br>Deciduitis:<br><br>11.3%<br><br>Amnionitis<br><br>+ deciduitis:<br><br>3.2% | 1. Hb<br><br>2. Hematocrit<br><br>3. Platelet<br><br>4. WBC<br><br>5. Neutrophil<br><br>6. Lymphocyte<br><br>7. Monocyte<br><br>8. Eosinophil<br><br>9. Basophil<br><br>10. PT<br><br>11. PTT<br><br>12. NLR<br><br>13. DNI<br><br>14. CRP | 1. HCA (-) < HCA (+)<br><br>2. HCA (-) < HCA (+)<br><br>3. HCA (-) = HCA (+)<br><br>4. HCA (-) = HCA (+)<br><br>5. HCA (-) = HCA (+)<br><br>6. HCA (-) < HCA (+)<br><br>7. HCA (-) = HCA (+)<br><br>8. HCA (-) = HCA (+)<br><br>9. HCA (-) = HCA (+)<br><br>10. HCA (-) < HCA (+)<br><br>11. HCA (-) = HCA (+)<br><br>12. HCA (-) < HCA (+)<br><br>13. HCA (-) < HCA (+)<br><br>14. HCA (-) < HCA (+) | N/A | N/A | N/A |
| Broumand<br>(2018)<br>[32]  | 1. GAD, 29 <sup>5</sup> -34 <sup>6</sup> wks<br><br>2. Preterm-PROM                                            | On admission                     | Preterm-PROM (48)                                   | 48<br>(29 vs. 19)  | Leukocyte<br>infiltration with<br>neutrophilic<br>priority on fetal<br>membranes | N/A                                  | N/A | N/A                                                                                                          | 1. WBC<br><br>2. ESR                                                                                                                                                                                                                       | 1. HCA (-) < HCA (+)<br><br>2. HCA (-) < HCA (+)                                                                                                                                                                                                                                                                                                                                                      | N/A | N/A | N/A |

|                           |                                                                                                                                             |                                                                                                    |                       |                         |                                                                                    |                                                                                                                 |     |                                                               |                                                                                                                      |                                                                                                                                                                                                                          |     |     |     |
|---------------------------|---------------------------------------------------------------------------------------------------------------------------------------------|----------------------------------------------------------------------------------------------------|-----------------------|-------------------------|------------------------------------------------------------------------------------|-----------------------------------------------------------------------------------------------------------------|-----|---------------------------------------------------------------|----------------------------------------------------------------------------------------------------------------------|--------------------------------------------------------------------------------------------------------------------------------------------------------------------------------------------------------------------------|-----|-----|-----|
| Shimoya<br>(1997)<br>[33] | 1. Spontaneous labor at term                                                                                                                | At delivery                                                                                        | N/A                   | 103<br>(81 vs. 22)      | Blanc's criteria<br>[45]                                                           | Stage I: Intervillositis<br><br>Stage II: Chorionitis<br><br>Stage III: CAM                                     | N/A | Stage 1: 72.7%<br><br>Stage 2: 18.2%<br><br>Stage 3: 9.1%     | 1. IL-1 $\alpha$<br><br>2. IL-1 $\beta$<br><br>3. TNF- $\alpha$<br><br>4. IL-6<br><br>5. IL-8                        | 1. HCA (-) = HCA (+)<br><br>2. HCA (-) < HCA (+)<br><br>3. HCA (-) = HCA (+)<br><br>4. HCA (-) = HCA (+)<br><br>5. HCA (-) < HCA (+)                                                                                     | N/A | N/A | N/A |
| Ahmed<br>(2016)<br>[34]   | 1. Singleton<br><br>2. GA 24-34 wks<br><br>3. Preterm-PROM                                                                                  | On admission<br><br>and delivery                                                                   | Preterm-PROM (60)     | 60<br>(24 vs. 36)       | Redline's criteria<br>[6]                                                          | Stage 1: Acute<br><br>subchorionitis or<br><br>chorionitis<br><br>Stage 2: ACAM<br><br>Stage 3: necrotizing CAM | N/A | N/A                                                           | 1. IL-6                                                                                                              | 1. HCA (-) < HCA (+)                                                                                                                                                                                                     | N/A | N/A | N/A |
| Yoneda<br>(2015)<br>[35]  | 1. C/S<br><br>2. GAD: HCA (-), 37wks<br>[24-41]; HCA (+), 33wks<br>[24-41]<br><br>3. Preterm-PROM(-)<br><br>4. Failure of trial of labor(-) | In preterm<br><br>delivery <48 h<br><br>before C/S,<br><br>In term<br><br><2 wks before<br><br>C/S | N/A                   | 428<br>(234 vs.<br>194) | Blanc's criteria<br>[43]                                                           | Stage I: Intervillositis<br><br>Stage II: Chorionitis<br><br>Stage III: CAM                                     | N/A | Stage I: 47.4%<br><br>Stage II: 35.0%<br><br>Stage III: 17.6% | 1. WBC<br><br>2. CRP                                                                                                 | 1. HCA (-) < HCA (+)<br><br>2. HCA (-) < HCA (+)                                                                                                                                                                         | N/A | N/A | N/A |
| Gulati<br>(2012)<br>[36]  | 1. GA 24-34 wks<br><br>2. Preterm-PROM                                                                                                      | On admission, at<br><br>48 h, and on day<br><br>7 of admission or<br><br>onset of labor            | Preterm-PROM (45)     | 45<br>(23 vs. 22)       | Leucocytic<br><br>infiltration in<br><br>amnion, chorion,<br><br>umbilical vessels | N/A                                                                                                             | N/A | N/A                                                           | 1. IL-6                                                                                                              | 1. HCA (-) < HCA (+)                                                                                                                                                                                                     | N/A | N/A | N/A |
| Caloone<br>(2016)<br>[37] | 1. Preterm-PROM<br><br>2. GA 22-37 wks                                                                                                      | Every 48 h<br><br>during<br><br>hospitalization<br><br>and at delivery                             | Preterm-PROM<br>(295) | 295<br>(169 vs.<br>126) | Redline's criteria<br>[6]                                                          | Stage 1: Acute<br><br>subchorionitis or<br><br>chorionitis<br><br>Stage 2: ACAM<br><br>Stage 3: necrotizing CAM | N/A | Stage 1: 28.9%<br><br>Stage 2: 44.4%<br><br>Stage 3: 26.7%    | 1. IL-6<br><br>2. IL-8<br><br>3. HNP<br><br>4. TREM-1<br><br>5. MMP-8<br><br>6. MMP-9<br><br>7. ICAM-1<br><br>8. CRP | 1. HCA (-) < HCA (+)<br><br>2. HCA (-) = HCA (+)<br><br>3. HCA (-) < HCA (+)<br><br>4. HCA (-) = HCA (+)<br><br>5. HCA (-) < HCA (+)<br><br>6. HCA (-) < HCA (+)<br><br>7. HCA (-) = HCA (+)<br><br>8. HCA (-) < HCA (+) | N/A | N/A | N/A |
| Cobo<br>(2012)<br>[38]    | 1. Singleton<br><br>2. GA 23-37 wks                                                                                                         | On admission<br><br>and every day<br><br>until delivery                                            | Preterm-PROM<br>(107) | 107<br>(46 vs. 61)      | Salafia's<br>criteria[ 46]                                                         | Choriodecidualitis<br><br>Amnionitis                                                                            | N/A | N/A                                                           | 1. WBC<br><br>2. CRP                                                                                                 | 1. HCA (-) = HCA (+)<br><br>2. HCA (-) < HCA (+)                                                                                                                                                                         | N/A | N/A | N/A |

|                            |                  |                                     |                   |             |                                       |                          |     |     |           |                      |     |     |     |
|----------------------------|------------------|-------------------------------------|-------------------|-------------|---------------------------------------|--------------------------|-----|-----|-----------|----------------------|-----|-----|-----|
| 3. Preterm-PROM            |                  |                                     |                   |             |                                       |                          |     |     |           |                      |     |     |     |
| Gulati<br>(2012)<br>[39]   | 1. Preterm-PROM  | At admission, at                    | Preterm-PROM (45) | 45          | Leucocytic                            | N/A                      | N/A | N/A | 1. IL-6   | 1. HCA (-) < HCA (+) | N/A | N/A | N/A |
|                            | 2. GA 24-34 wks  | 48 h, and on day                    |                   | (23 vs. 22) | infiltration in                       |                          |     |     |           |                      |     |     |     |
|                            | 3. Singleton     | 7 of admission or<br>onset of labor |                   |             | amnion, chorion,<br>umbilical vessels |                          |     |     |           |                      |     |     |     |
| Škrablin<br>(2007)<br>[40] | 1. PTL           | On admission &                      | PTB (47)          | 47          | Modified                              | Choriodecidualitis       | N/A | N/A | 1. IL-6   | 1. HCA (-) < HCA (+) | N/A | N/A | N/A |
|                            | 2. Preterm-PROM  | active phase of                     | = PTL (20) vs.    | (24 vs. 23) | Salafia's criteria                    | Amnionitis               |     |     | 2. IL-1β  | 2. HCA (-) < HCA (+) |     |     |     |
|                            | 3. GA 27-33 wks  | labor                               | Preterm-PROM (27) |             | [44]                                  |                          |     |     | 3. hsCRP  | 3. HCA (-) < HCA (+) |     |     |     |
|                            | 4. GAD <37 wks   |                                     |                   |             |                                       |                          |     |     |           |                      |     |     |     |
| Ohyama<br>(2002)<br>[41]   | 1. Singleton     | N/A                                 | Preterm-PROM (90) | 143         | Blanc's criteria                      | Stage I: Intervillositis | N/A | N/A | 1. WBC    | 1. WBC               | N/A | N/A | N/A |
|                            | 2. GAD 23-32 wks |                                     |                   | (53 vs. 90) | [43]                                  | Stage II: Chorionitis    |     |     |           | HCA (-) < ACAM (+)   |     |     |     |
|                            |                  |                                     |                   |             |                                       | Stage III: CAM           |     |     |           | HCA (-) < SCAM (+)   |     |     |     |
|                            |                  |                                     |                   |             |                                       |                          |     |     | 2. CRP    | 2. CRP               |     |     |     |
|                            |                  |                                     |                   |             |                                       |                          |     |     |           | ACAM (+) < SCAM (+)  |     |     |     |
|                            |                  |                                     |                   |             |                                       |                          |     |     |           | HCA (-) < ACAM (+)   |     |     |     |
|                            |                  |                                     |                   |             |                                       |                          |     |     |           | HCA (-) < SCAM (+)   |     |     |     |
| Zou<br>(2004)<br>[42]      | 1. Singleton     | 24 h prior to                       | PROM (55)         | 55          | PMN leukocyte                         | N/A                      | N/A | N/A | 1. ICAM-1 | 1. HCA (-) < HCA (+) | N/A | N/A | N/A |
|                            |                  | onset of labor                      |                   | (34 vs. 21) | infiltration of                       |                          |     |     | 2. CRP    | 2. HCA (-) < HCA (+) |     |     |     |
|                            |                  | or C/S                              |                   |             | chorionic plate<br>and amnion         |                          |     |     |           |                      |     |     |     |

*ACAM*, acute chorioamnionitis; *AF*, amniotic fluid; *AM*, adrenomedullin; *APRIL*, a proliferation-inducing ligand; *CAM*, chorioamnionitis; *CRP*, C-reactive protein; *C/S*, cesarean section; *CXCL*, C-X-C motif chemokine ligand; *DNI*, delta neutrophil index; *EPM*, extraplacental membranes; *ESR*, erythrocyte sedimentation rate; *GA*, gestational age; *GAA*, gestational age at amniocentesis; *GAD*, gestational age at delivery; *Hb*, hemoglobin; *HCA*, histologic chorioamnionitis; *HNP*, human neutrophil peptides; *IAI*, intra-amniotic inflammation; *ICAM*, intercellular adhesion molecule; *IGFBP*, insulin-like growth factor-binding protein; *IL*, interleukin; *MCAF*, monocyte chemotactic and activating factor; *MIR*, maternal inflammatory response; *MMP*, matrix metalloproteinase; *N/A*, not available; *NICU*, neonatal intensive care unit; *NLR*, neutrophil to lymphocyte ratio; *PMN*, polymorphonuclear neutrophil; *preterm-PROM*, preterm premature rupture of membranes; *PT (INR)*, prothrombin time (international normalized ratio); *PTB*, preterm birth; *PTL*, preterm labor and intact membranes; *PTT (sec)*, partial thromboplastin time (seconds); *S100 A8/A9*, S100 calcium-binding protein A8/A9 complex; *SCAM*, subacute chorioamnionitis; *SD*, standard deviation; *sIL-6R*, soluble IL-6 receptor; *TIMP*, tissue inhibitor of metalloproteinase; *TNF*, tumor necrosis factor; *TREM*, triggering receptor of myeloid cells; *vs.*, versus; *WBC*, white blood cell.
