# Supplementary material for: Neutrophil to Lymphocyte Ratio in Maternal Blood: A Clue to Suspect Amnionitis
Source: MDPI journal article supplement (doi:10.3390/jcm10122673), 2021-06-17
Supplement: s1 [file s1]

## Supplementary Tables

**Table S2.** Diagnostic indices, predictive values, and likelihood ratios of maternal high sensitivity C-reactive protein (hs-CRP)  $\geq 1.035$  mg/dL within 48 hours before delivery for the identification of amnionitis in cases with either preterm labor and intact membranes (PTL) or preterm premature rupture of membranes (preterm-PROM) (The prevalence of amnionitis is 11.6% [14/121<sup>†</sup>]).

|                           | Sensitivity  | Specificity    | Positive predictive value | Negative predictive value | Positive LR (95% CI)   | Negative LR (95% CI)   |
|---------------------------|--------------|----------------|---------------------------|---------------------------|------------------------|------------------------|
| hs-CRP $\geq 1.035$ mg/dL | 57.1% (8/14) | 63.6% (68/108) | 17.0% (8/47)              | 91.9% (68/74)             | 1.1074 [0.9569-1.2816] | 0.4764 [0.1764-1.2863] |

CI, confidence interval; LR, likelihood ratio; *hs-CRP*, High sensitivity C-reactive protein

<sup>†</sup> Among 132 patients included in this study, hs-CRP results within 48 hours before delivery were not available in 11 cases, and therefore, we analyzed hs-CRP data in only 121 patients.

**Table S3.** Relationship of various independent variables with amnionitis analyzed by overall logistic regression analysis<sup>†</sup>.

|                                                                                          | Odds ratio | 95% Confidence Interval | P value    |
|------------------------------------------------------------------------------------------|------------|-------------------------|------------|
| Increased maternal hs-CRP ( $\geq 1.035$ mg/dL)                                          | 2.996      | 0.777-11.553            | NS (0.111) |
| Gestational age at delivery (on a daily basis)                                           | 0.789      | 0.633-0.985             | 0.036      |
| Parity ( $\geq 1$ )                                                                      | 1.733      | 0.462-6.494             | NS (0.415) |
| Preterm-PROM as a cause of PTB                                                           | 1.463      | 0.391-5.472             | NS (0.572) |
| Vaginal delivery                                                                         | 1.017      | 0.246-4.208             | NS (0.981) |
| Antenatal corticosteroids use                                                            | 2.100      | 0.298-14.790            | NS (0.456) |
| Antenatal antibiotics use                                                                | 2.207      | 0.167-24.566            | NS (0.579) |
| Antenatal tocolytics use                                                                 | 1.945      | 0.313-12.081            | NS (0.475) |
| Meconium staining                                                                        | 0.564      | 0.056-5.643             | NS (0.626) |
| Male sex of newborn                                                                      | 1.283      | 0.367-4.486             | NS (0.696) |
| Either clinical history of antenatal vaginal bleeding or the evidence of placenta previa | 9.113      | 1.061-78.274            | 0.044      |

*hs-CRP*, high sensitivity C-reactive protein; *preterm-PROM*, preterm premature rupture of membranes; *PTB*, preterm birth.

<sup>†</sup> Among 132 patients included in this study, hs-CRP results within 48 hours before delivery were not available in 11 cases, and therefore, we analyzed hs-CRP data in only 121 patients.
