# Supplementary material for: Neutrophil to Lymphocyte Ratio in Maternal Blood: A Clue to Suspect Amnionitis
Source: J Clin Med. 2021 Jun 17;10(12):2673. doi: 10.3390/jcm10122673 (PMC8235298; doi:10.3390/jcm10122673)
Supplement: Supplementary file 1 [file jcm-10-02673-s001.zip]

Archive with 6 entries (6 files):
- New Supplementary Figure 1_300dpi.tif
- New Supplementary Figure 2_300dpi.tif
- New Supplementary Figure 3_300dpi.tif
- New Supplementary Table 1.pdf
- New Supplementary Table 2 and Table 3.pdf
- New Supplementary_Material_Figure legends.pdf
